# Supplementary material
Source: Springer Nature journal article supplement (https://www.springermedizin.de/resource/supplementary/13075_2011_3523_MOESM2_ESM.pdf/9694702)

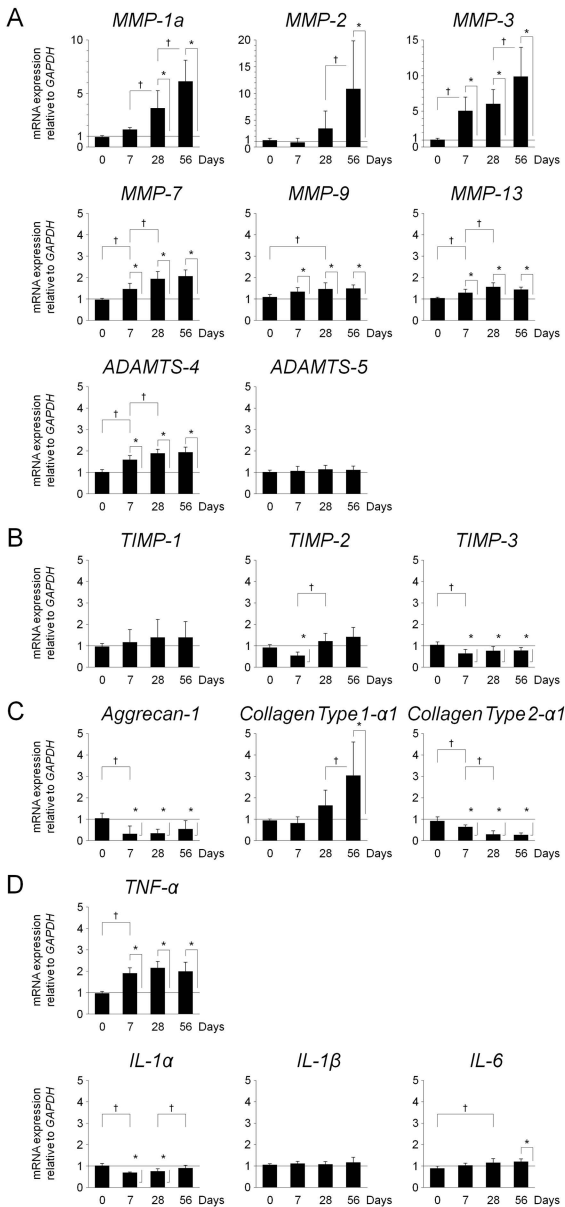

Supplement: MOESM2 [file 9694702]
